# Supplementary material
Source: MDPI journal article supplement (https://www.mdpi.com/2311-7524/9/8/877)
Supplement: s1 [file s1]

**Table S1.** Ecological profile across the natural distribution range of *Campanula pelviformis* wild-growing populations in Crete linked in GIS with geodatabases (WorldClim version 2.1), providing values for: **(A)** minimum temperatures per month (°C), **(B)** maximum temperatures per month (°C), **(C)** average temperatures per month (°C), **(D)** precipitation per month (mm), and **(E)** calculated values for 19 bioclimatic variables. For **(A–E)** minimum, maximum, average, and standard deviation is shown based on data from 1970–2000. The colors of the plotted lines illustrate the minimum (blue), maximum (orange), and mean (grey) monthly values for temperature (°C) and precipitation (mm).

| Months                                                                              | Minimum Temperature, Tmin (°C) |       |       |      | Maximum Temperature, Tmax (°C) |       |       |      | Average Temperature, Tavg (°C) |       |       |      | Precipitation, P (mm) |        |        |       | Nineteen Bioclimatic Variables               |        |        |        |       |
|-------------------------------------------------------------------------------------|--------------------------------|-------|-------|------|--------------------------------|-------|-------|------|--------------------------------|-------|-------|------|-----------------------|--------|--------|-------|----------------------------------------------|--------|--------|--------|-------|
|                                                                                     | Tmin                           | Tmax  | Tmean | std  | Tmin                           | Tmax  | Tmean | std  | Tmin                           | Tmax  | Tmean | std  | Pmin                  | Pmax   | Pmean  | std   |                                              | Min    | Max    | Mean   | std   |
| Jan                                                                                 | 6,02                           | 9,48  | 7,94  | 0,86 | 11,57                          | 15,24 | 13,60 | 0,91 | 8,81                           | 12,36 | 10,77 | 0,89 | 110,13                | 158,88 | 134,03 | 12,20 | Annual Mean Temperature (Bio_1)              | 15,61  | 18,85  | 17,41  | 0,81  |
| Feb                                                                                 | 5,71                           | 9,18  | 7,63  | 0,86 | 11,63                          | 15,23 | 13,64 | 0,89 | 8,81                           | 12,21 | 10,69 | 0,86 | 81,75                 | 116,94 | 98,31  | 8,99  | Mean Diurnal Range (Bio_2)                   | 6,57   | 7,10   | 6,86   | 0,13  |
| Mar                                                                                 | 6,80                           | 10,21 | 8,69  | 0,85 | 13,34                          | 16,73 | 15,22 | 0,84 | 10,07                          | 13,46 | 11,96 | 0,84 | 61,25                 | 90,50  | 75,16  | 7,47  | Isothermality (Bio_3)                        | 31,22  | 32,61  | 31,98  | 0,33  |
| Apr                                                                                 | 9,30                           | 12,44 | 11,04 | 0,78 | 16,44                          | 19,54 | 18,17 | 0,77 | 12,89                          | 15,98 | 14,61 | 0,77 | 27,63                 | 45,06  | 36,09  | 4,37  | Temperature Seasonality (Bio_4)              | 545,66 | 569,72 | 557,82 | 5,86  |
| May                                                                                 | 12,81                          | 15,88 | 14,52 | 0,77 | 20,86                          | 23,58 | 22,37 | 0,67 | 16,82                          | 19,73 | 18,45 | 0,72 | 12,00                 | 22,94  | 16,90  | 2,75  | Max Temperature of Warmest Month (Bio_5)     | 27,55  | 30,29  | 29,07  | 0,68  |
| Jun                                                                                 | 16,79                          | 19,85 | 18,50 | 0,76 | 25,47                          | 28,08 | 26,91 | 0,65 | 21,13                          | 23,96 | 22,71 | 0,70 | 2,50                  | 7,31   | 4,54   | 1,22  | Min Temperature of Coldest Month (Bio_6)     | 5,71   | 9,18   | 7,63   | 0,86  |
| Jul                                                                                 | 19,60                          | 22,90 | 21,45 | 0,82 | 27,55                          | 30,29 | 29,07 | 0,68 | 23,59                          | 26,58 | 25,26 | 0,75 | 1,00                  | 3,13   | 1,68   | 0,60  | Temperature Annual Range (Bio_7)             | 20,90  | 21,91  | 21,44  | 0,25  |
| Aug                                                                                 | 19,68                          | 23,03 | 21,56 | 0,84 | 27,44                          | 30,21 | 28,97 | 0,69 | 23,56                          | 26,61 | 25,26 | 0,76 | 1,00                  | 2,94   | 2,00   | 0,52  | Mean Temperature of Wettest Quarter (Bio_8)  | 9,26   | 12,79  | 11,22  | 0,88  |
| Sep                                                                                 | 17,23                          | 20,70 | 19,15 | 0,86 | 24,70                          | 27,59 | 26,29 | 0,72 | 20,97                          | 24,12 | 22,72 | 0,79 | 14,88                 | 19,69  | 17,42  | 1,20  | Mean Temperature of Driest Quarter (Bio_9)   | 22,76  | 25,71  | 24,41  | 0,74  |
| Oct                                                                                 | 13,78                          | 17,29 | 15,72 | 0,87 | 20,61                          | 23,86 | 22,41 | 0,81 | 17,18                          | 20,55 | 19,06 | 0,84 | 46,50                 | 75,31  | 60,61  | 7,42  | Mean Temperature of Warmest Quarter (Bio_10) | 22,91  | 25,77  | 24,44  | 0,75  |
| Nov                                                                                 | 10,24                          | 13,79 | 12,19 | 0,88 | 16,40                          | 19,91 | 18,35 | 0,87 | 13,33                          | 16,83 | 15,27 | 0,87 | 63,25                 | 81,88  | 72,80  | 4,80  | Mean Temperature of Coldest Quarter (Bio_11) | 9,18   | 12,67  | 11,12  | 0,87  |
| Dec                                                                                 | 7,49                           | 10,93 | 9,39  | 0,86 | 13,09                          | 16,74 | 15,11 | 0,91 | 10,29                          | 13,81 | 12,25 | 0,88 | 97,44                 | 140,38 | 120,09 | 11,06 | Annual Precipitation (Bio_12)                | 519,69 | 763,50 | 639,31 | 62,03 |
| 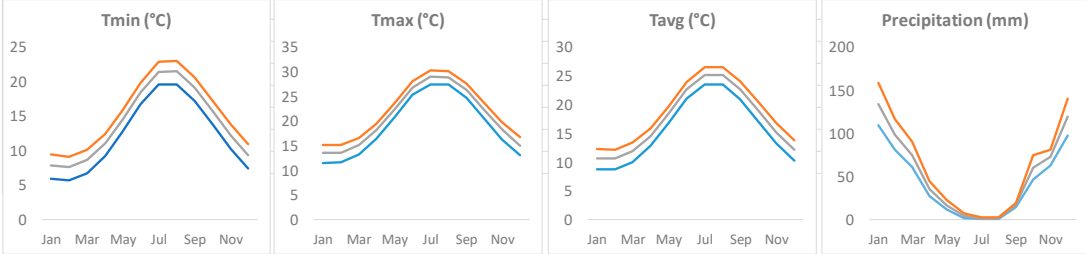 |                                |       |       |      |                                |       |       |      |                                |       |       |      |                       |        |        |       | Precipitation of Wettest Month (Bio_13)      | 110,00 | 158,25 | 133,69 | 12,29 |
|                                                                                     |                                |       |       |      |                                |       |       |      |                                |       |       |      |                       |        |        |       | Precipitation of Driest Month (Bio_14)       | 1,00   | 2,56   | 1,56   | 0,48  |
|                                                                                     |                                |       |       |      |                                |       |       |      |                                |       |       |      |                       |        |        |       | Precipitation Seasonality (Bio_15)           | 85,30  | 88,91  | 87,17  | 0,88  |
|                                                                                     |                                |       |       |      |                                |       |       |      |                                |       |       |      |                       |        |        |       | Precipitation of Wettest Quarter (Bio_16)    | 289,19 | 415,56 | 352,09 | 32,28 |
|                                                                                     |                                |       |       |      |                                |       |       |      |                                |       |       |      |                       |        |        |       | Precipitation of Driest Quarter (Bio_17)     | 4,31   | 13,38  | 8,22   | 2,24  |
|                                                                                     |                                |       |       |      |                                |       |       |      |                                |       |       |      |                       |        |        |       | Precipitation of Warmest Quarter (Bio_18)    | 8,50   | 21,31  | 15,13  | 3,58  |
|                                                                                     |                                |       |       |      |                                |       |       |      |                                |       |       |      |                       |        |        |       | Precipitation of Coldest Quarter (Bio_19)    | 253,06 | 368,69 | 308,94 | 30,08 |
|                                                                                     |                                |       |       |      |                                |       |       |      |                                |       |       |      |                       |        |        |       | (E)                                          |        |        |        |       |
